# Supplementary material for: Feline Infectious Peritonitis as a Systemic Inflammatory Disease: Contribution of Liver and Heart to the Pathogenesis
Source: MDPI journal article supplement (doi:10.3390/v11121144), 2019-12-10
Supplement: s1 [file s1]

**Table S1:** Amino acid sequences used for anti-feline cytokine antibody production.

| <b>Cytokine</b> | <b>NCBI Acc.-No.</b> | <b>Position</b> | <b>Amino acid sequence</b> |
|-----------------|----------------------|-----------------|----------------------------|
| IL-1 $\beta$    | AAA30814             | 251-264         | Cys-NTKGGQDITDFIME         |
| IL-6            | P41683               | 191-204         | Cys-LRRLEDFLQFSLRA         |
| IL-10           | AAC64708             | 144-157         | Cys-STFSKLQEKG VYKA        |
| IL-12p40        | AAB93835             | 185-198         | Cys-RDYKKYTVECEGS          |
| TNF- $\alpha$   | AAA30818             | 202-215         | Cys-LEKGDRLSAEINLP         |
