# Supplementary material for: Feline Infectious Peritonitis as a Systemic Inflammatory Disease: Contribution of Liver and Heart to the Pathogenesis
Source: MDPI journal article supplement (doi:10.3390/v11121144), 2019-12-10
Supplement: s1 [file s1]

**Table S2:** Distribution statistics for all liver study groups.

| Cytokine      | Group     | No.+ve/<br>group total | Mean<br>( $2^{-\Delta CT}$ ) | Distribution statistics |                                |       |          |
|---------------|-----------|------------------------|------------------------------|-------------------------|--------------------------------|-------|----------|
|               |           |                        |                              | SE of mean              | Median<br>( $2^{-\Delta CT}$ ) | SD    | Variance |
| IL-6          | 1.1       | 14/16                  | 0.052                        | 0.046                   | 0.005                          | 0.186 | 0.034    |
|               | 1.1a      | 10/12                  | 0.067                        | 0.062                   | 0.003                          | 0.214 | 0.046    |
|               | 1.1b      | 4/4                    | 0.008                        | 0.004                   | 0.006                          | 0.009 | 0.000    |
|               | 1.1eff    | 5/6                    | 0.008                        | 0.003                   | 0.007                          | 0.008 | 0.000    |
|               | 1.1no eff | 6/7                    | 0.001                        | 0.000                   | 0.000                          | 0.002 | 0.000    |
|               | 1.2       | 12/14                  | 0.000                        | 0.000                   | 0.000                          | 0.000 | 0.000    |
| IL-10         | 1.1       | 13/16                  | 0.011                        | 0.004                   | 0.004                          | 0.015 | 0.000    |
|               | 1.1a      | 9/12                   | 0.014                        | 0.005                   | 0.008                          | 0.016 | 0.000    |
|               | 1.1b      | 4/4                    | 0.001                        | 0.000                   | 0.001                          | 0.001 | 0.000    |
|               | 1.1eff    | 5/6                    | 0.010                        | 0.007                   | 0.001                          | 0.018 | 0.000    |
|               | 1.1no eff | 5/7                    | 0.008                        | 0.004                   | 0.002                          | 0.013 | 0.000    |
|               | 1.2       | 14/14                  | 0.000                        | 0.000                   | 0.000                          | 0.000 | 0.000    |
| IL-12p40      | 1.1       | 15/16                  | 0.007                        | 0.003                   | 0.004                          | 0.011 | 0.000    |
|               | 1.1a      | 11/12                  | 0.010                        | 0.003                   | 0.009                          | 0.009 | 0.000    |
|               | 1.1b      | 4/4                    | 0.000                        | 0.000                   | 0.000                          | 0.000 | 0.000    |
|               | 1.1eff    | 6/6                    | 0.004                        | 0.004                   | 0.000                          | 0.009 | 0.000    |
|               | 1.1no eff | 6/7                    | 0.010                        | 0.005                   | 0.006                          | 0.015 | 0.000    |
|               | 1.2       | 14/14                  | 0.000                        | 0.000                   | 0.000                          | 0.000 | 0.000    |
| TNF- $\alpha$ | 1.1       | 14/16                  | 0.008                        | 0.002                   | 0.007                          | 0.009 | 0.000    |
|               | 1.1a      | 10/12                  | 0.010                        | 0.003                   | 0.009                          | 0.009 | 0.000    |
|               | 1.1b      | 4/4                    | 0.000                        | 0.000                   | 0.000                          | 0.000 | 0.000    |
|               | 1.1eff    | 5/6                    | 0.002                        | 0.002                   | 0.001                          | 0.004 | 0.000    |
|               | 1.1no eff | 6/7                    | 0.007                        | 0.002                   | 0.007                          | 0.006 | 0.000    |
|               | 1.2       | 13/14                  | 0.000                        | 0.000                   | 0.000                          | 0.000 | 0.000    |

1.1a: natural FIP cases; 1.1b: experimental FIP cases; 1.2: controls cats; 1.1eff: FIP cats with effusions; 1.1no eff: FIP cats without effusions; +ve: positive by PCR for the given cytokine; SE: standard error; SD: standard deviation.
