# Supplementary material for: Feline Infectious Peritonitis as a Systemic Inflammatory Disease: Contribution of Liver and Heart to the Pathogenesis
Source: MDPI journal article supplement (doi:10.3390/v11121144), 2019-12-10
Supplement: s1 [file s1]

**Table S3:** Distribution statistics for all heart study groups.

| Cytokine      | Group     | Distribution statistics      |            |                                |          |          |
|---------------|-----------|------------------------------|------------|--------------------------------|----------|----------|
|               |           | Mean<br>( $2^{-\Delta CT}$ ) | SE of mean | Median<br>( $2^{-\Delta CT}$ ) | SD       | Variance |
| IL-1 $\beta$  | 2.1       | 9.29E-05                     | 8.60E-06   | 8.20E-05                       | 7.53E-05 | 5.67E-05 |
|               | 2.1eff    | 1.06E-04                     | 9.60E-06   | 1.05E-04                       | 7.06E-05 | 4.98E-05 |
|               | 2.1no eff | 7.57E-05                     | 1.99E-05   | 6.50E-05                       | 8.20E-05 | 6.72E-05 |
|               | 2.2       | 5.32E-05                     | 1.18E-05   | 5.40E-05                       | 8.07E-05 | 6.51E-05 |
|               | 2.2a      | 1.20E-04                     | 1.49E-05   | 1.20E-04                       | 6.32E-05 | 4.00E-05 |
|               | 2.2b      | 1.18E-05                     | 1.12E-05   | 2.00E-05                       | 6.03E-05 | 3.63E-05 |
|               | 2.3       | 1.03E-04                     | 1.30E-05   | 1.06E-04                       | 4.30E-05 | 1.85E-05 |
| IL-6          | 2.1       | 1.72E-04                     | 9.60E-06   | 1.71E-04                       | 8.40E-05 | 7.05E-05 |
|               | 2.1eff    | 1.80E-04                     | 1.09E-05   | 1.81E-04                       | 8.23E-05 | 6.78E-05 |
|               | 2.1no eff | 1.62E-04                     | 2.26E-05   | 1.54E-04                       | 9.03E-05 | 8.16E-05 |
|               | 2.2       | 9.67E-05                     | 1.38E-05   | 7.05E-05                       | 9.39E-05 | 8.82E-05 |
|               | 2.2a      | 1.39E-04                     | 2.56E-05   | 1.12E-04                       | 1.09E-04 | 1.18E-04 |
|               | 2.2b      | 6.93E-05                     | 1.37E-05   | 6.05E-05                       | 7.27E-05 | 5.29E-05 |
|               | 2.3       | 1.49E-04                     | 2.32E-05   | 1.41E-04                       | 7.32E-05 | 5.36E-05 |
| TNF- $\alpha$ | 2.1       | 9.95E-05                     | 7.60E-06   | 9.10E-05                       | 6.79E-05 | 4.61E-05 |
|               | 2.1eff    | 1.09E-04                     | 1.03E-05   | 1.12E-04                       | 7.52E-05 | 5.65E-05 |
|               | 2.1no eff | 8.74E-05                     | 1.07E-05   | 7.85E-05                       | 5.00E-05 | 2.50E-05 |
|               | 2.2       | 1.07E-05                     | 1.11E-05   | 1.10E-05                       | 7.42E-05 | 5.51E-05 |
|               | 2.2a      | 1.93E-05                     | 1.86E-05   | 3.70E-05                       | 7.44E-05 | 5.54E-05 |
|               | 2.2b      | 5.90E-06                     | 1.39E-05   | 4.00E-06                       | 7.50E-05 | 5.62E-05 |
|               | 2.3       | 9.82E-05                     | 2.57E-05   | 6.95E-05                       | 8.89E-05 | 7.91E-05 |

2.1: cats with FIP; 2.2: control cats; 2.2a: control cats up to 3 years old; 2.2b: control cats greater than 9 years old;  
2.3: cats with systemic inflammatory disease other than FIP; 2.1eff: FIP cats with effusions; 2.1no eff: FIP cats without effusions.
